# Supplementary material
Source: PubMed Central journal article supplement (PMC1851087)

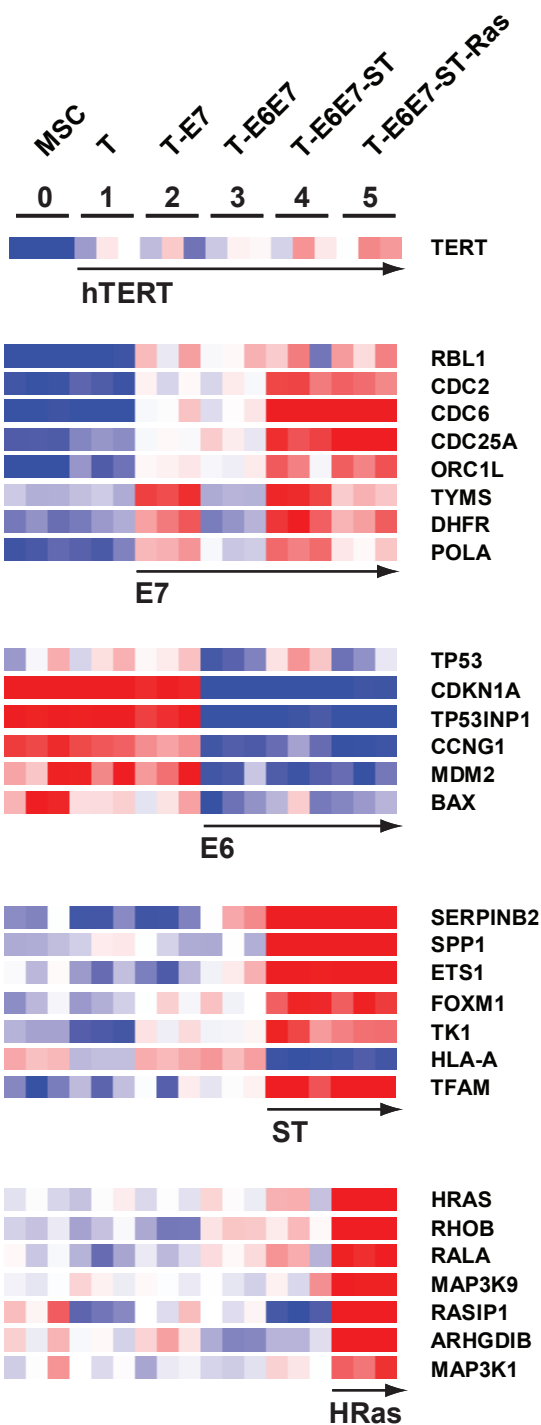

Supplement: pnas_0700690104_1.pdf [file pnas_0700690104_1.pdf]

### Apoptosis

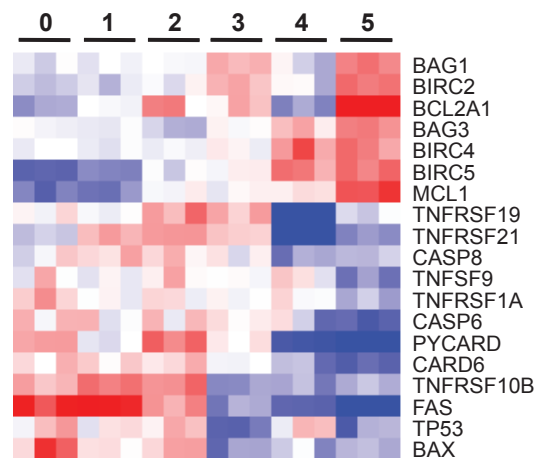

### Angiogenesis

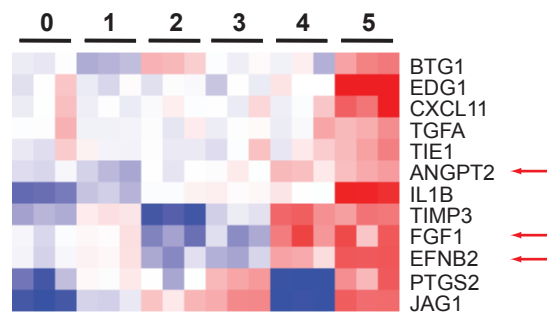

### Immunity

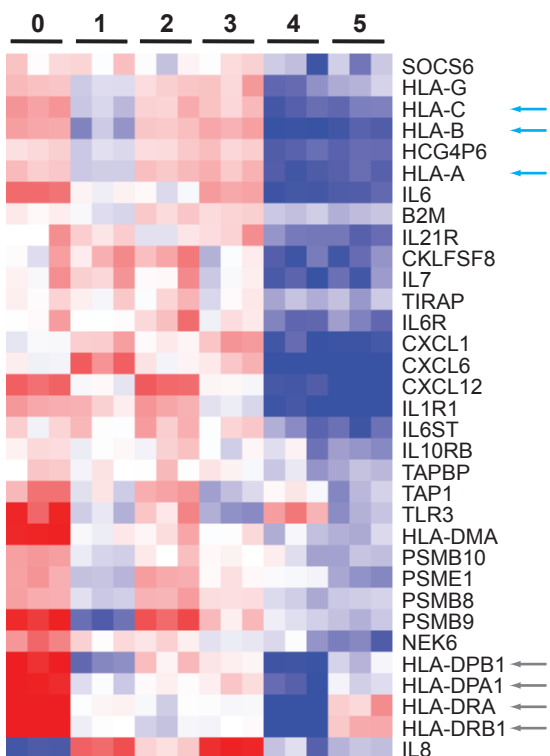

### Metastasis

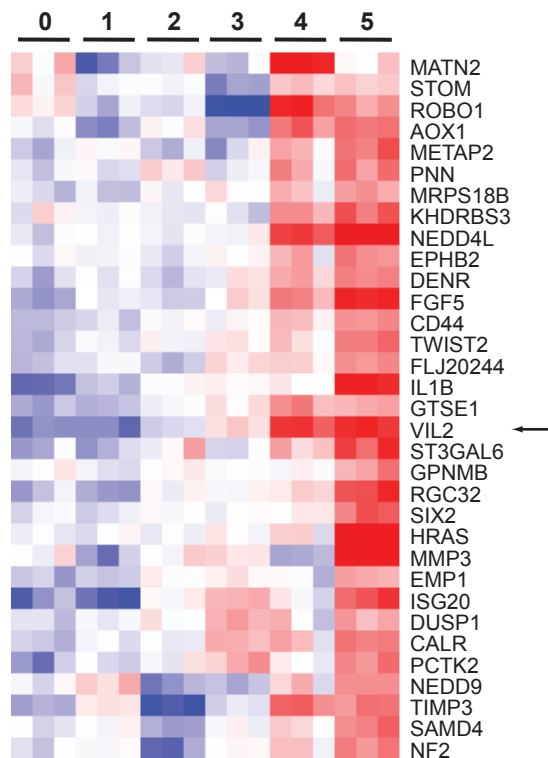

Supplement: pnas_0700690104_2.pdf [file pnas_0700690104_2.pdf]

**A**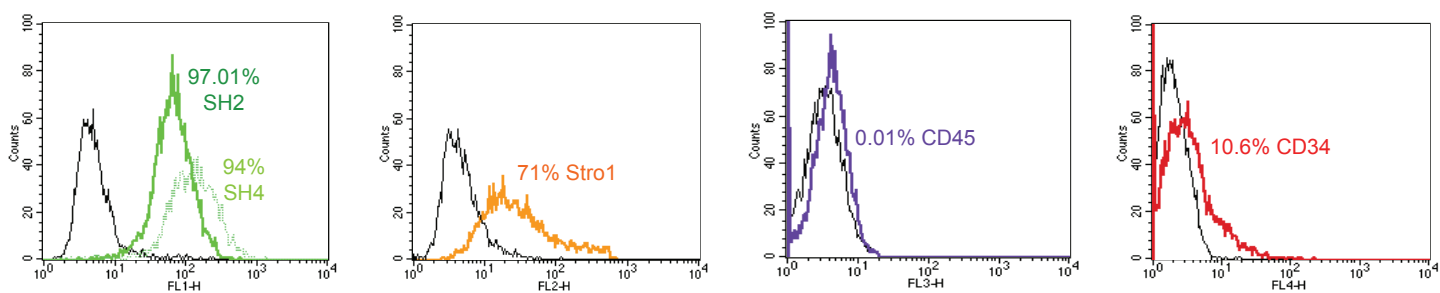**B**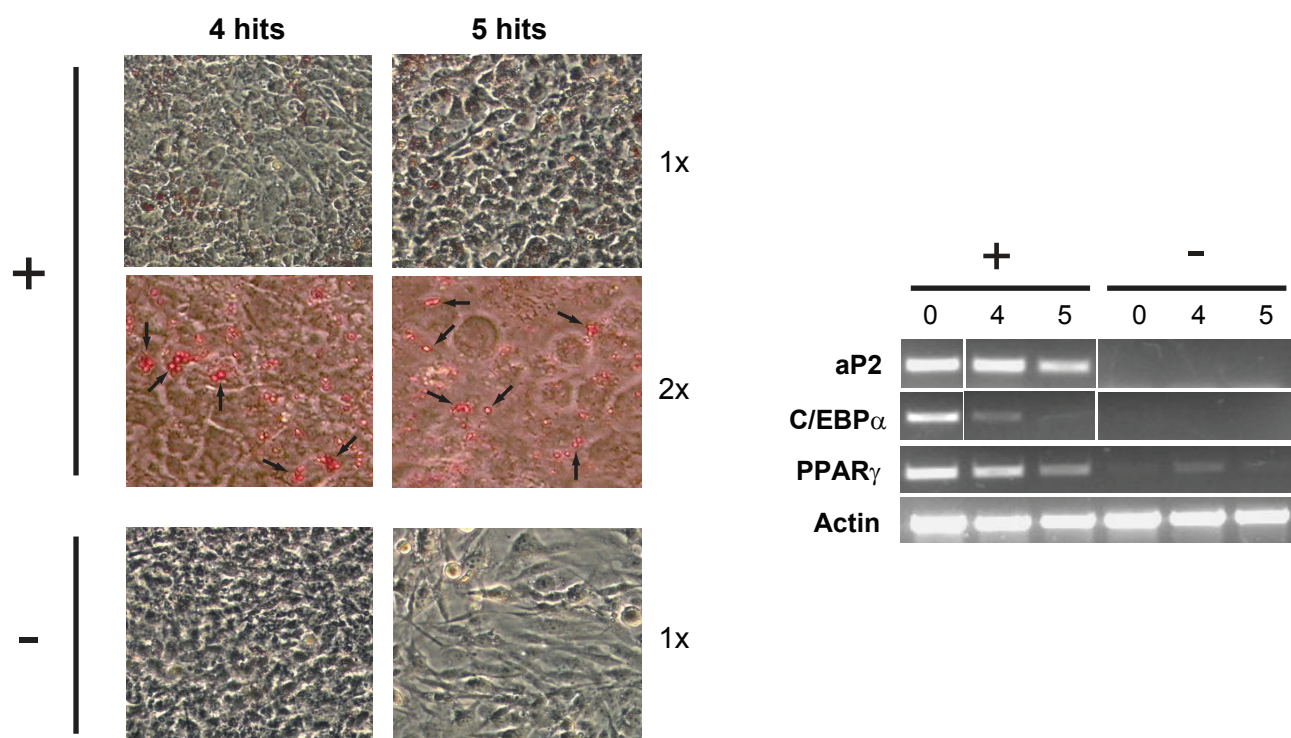**C**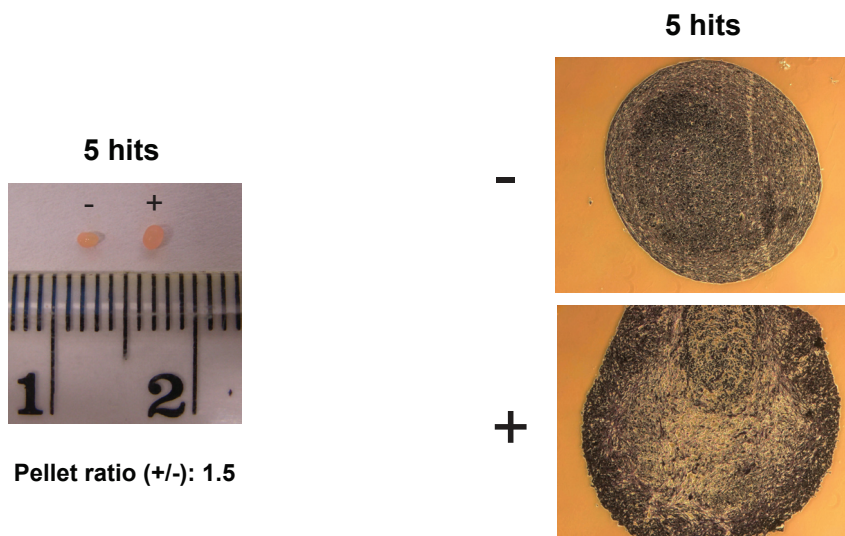

Supplement: pnas_0700690104_3.pdf [file pnas_0700690104_3.pdf]

# GLYCOLYSIS

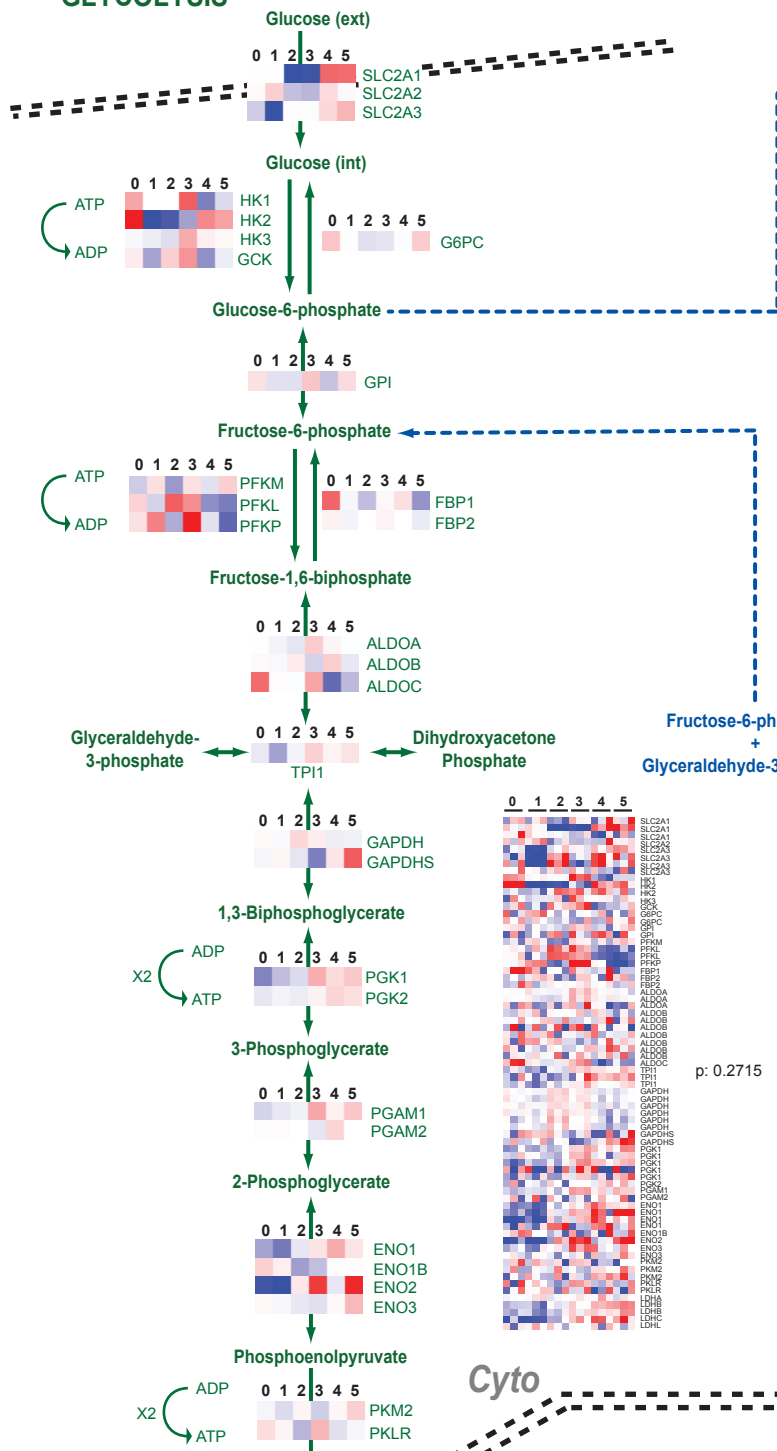

# PENTOSE PHOSPHATE PATHWAY

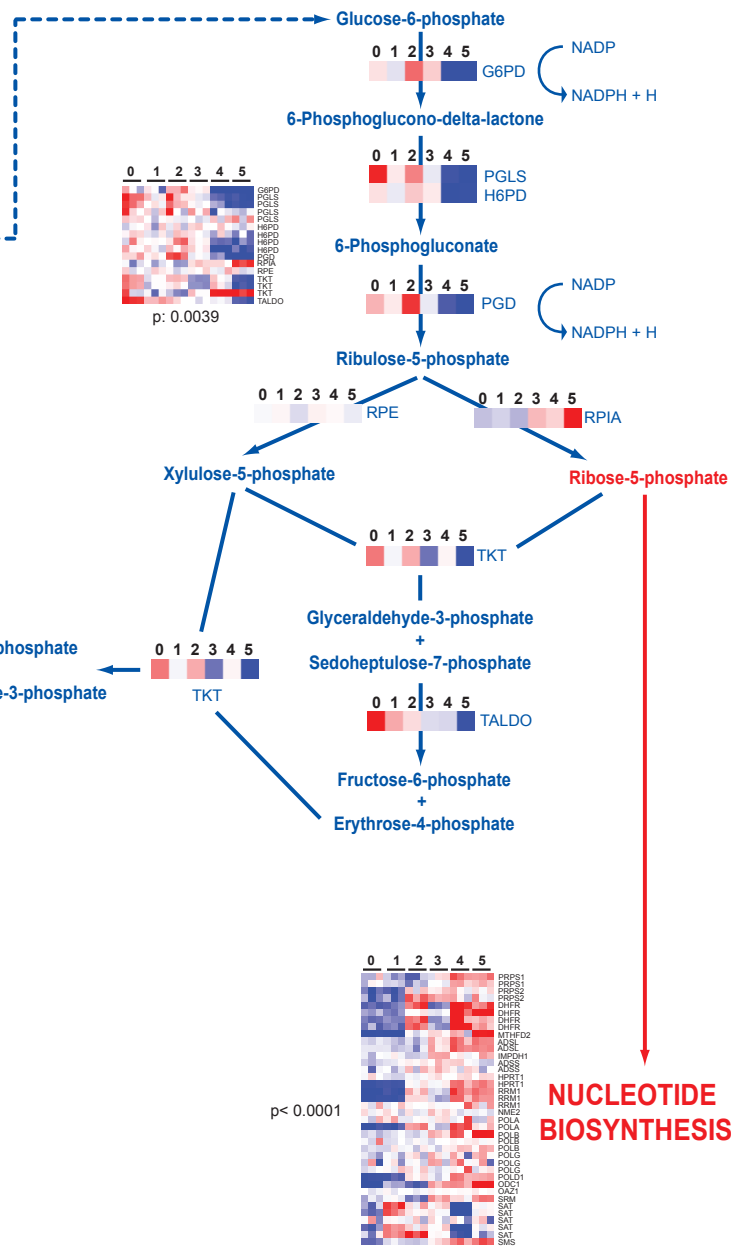

Cyto

Mito

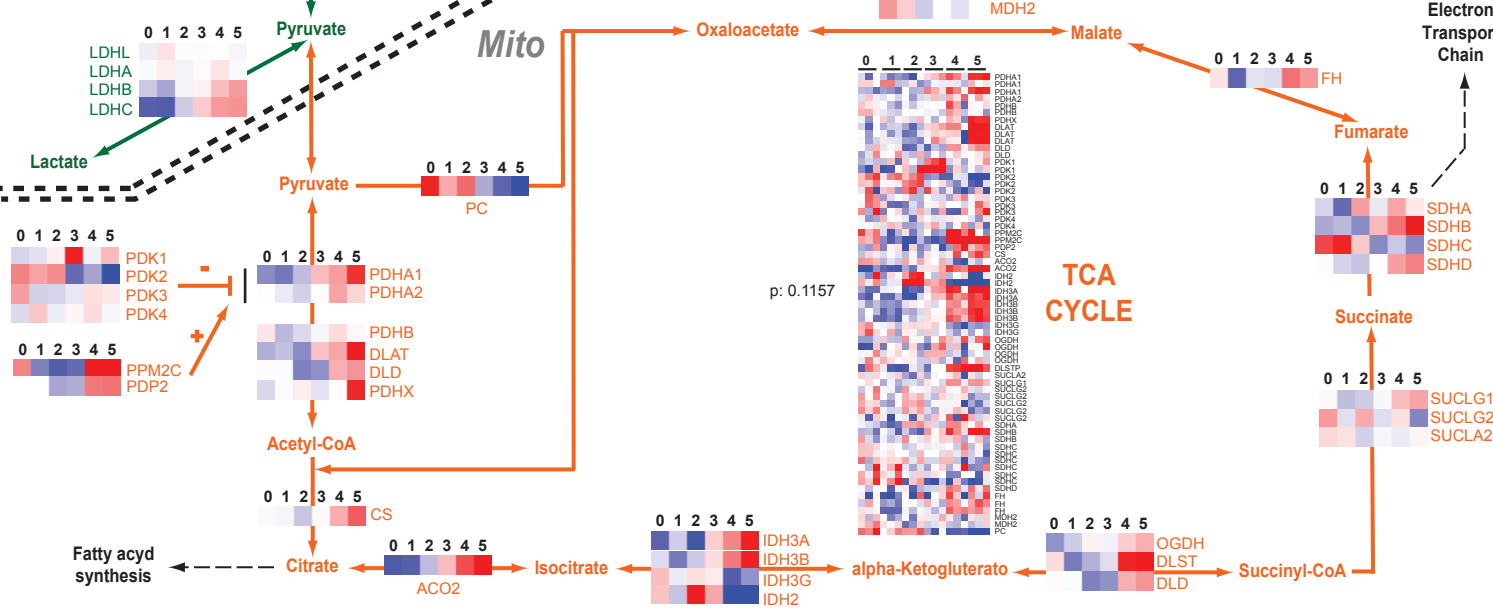

Supplement: pnas_0700690104_4.pdf [file pnas_0700690104_4.pdf]

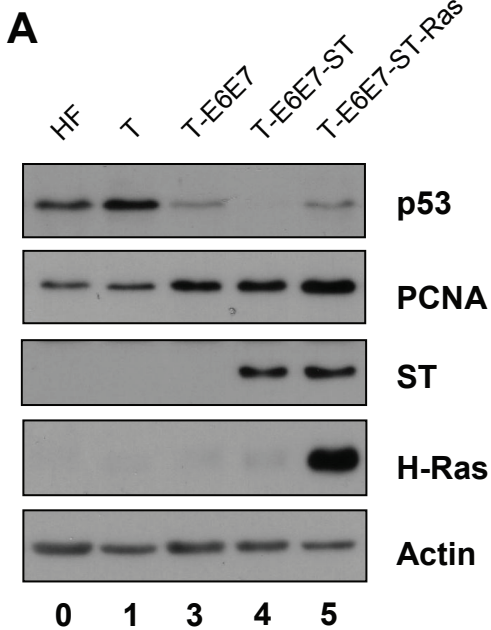

**B**

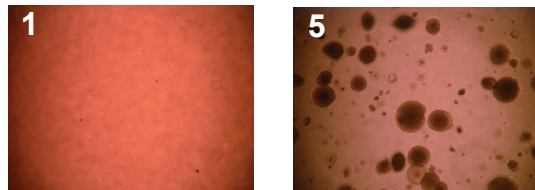

**C**

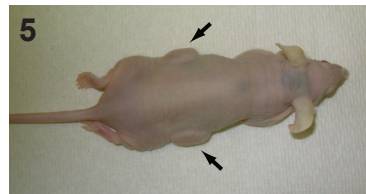

Supplement: pnas_0700690104_5.pdf [file pnas_0700690104_5.pdf]
